# Supplementary material for: 2-Diphenylaminothiophene as the donor of porphyrin sensitizers for dye-sensitized solar cells
Source: Royal Society of Chemistry journal article supplement (doi:10.1039/c4nj00651h), 2014-01-01
Supplement: c4nj00651h1.pdf [file c4nj00651h1.pdf]

## Supporting Information for

### 2-Diphenylaminothiophene as the donor of porphyrin sensitizers for dye-sensitized solar cells

Yueqiang Wang<sup>a</sup>, Lu Xu<sup>a</sup>, Xiaodong Wei<sup>a</sup>, Xin Li<sup>b</sup>, Hans Ågren<sup>b</sup>, Wenjun Wu<sup>a</sup>, and Yongshu Xie<sup>\*a</sup>

<sup>a</sup>Key Laboratory for Advanced Materials and Institute of Fine Chemicals, East China University of Science and Technology, Shanghai, P. R. China.; E-mail: yshxie@ecust.edu.cn; Fax: (+86) 21-6425-2758. Tel: (+86) 21-6425-0772.

<sup>b</sup>Department of Theoretical Chemistry and Biology, School of Biotechnology KTH Royal Institute of Technology, SE-10691 Stockholm, Sweden

**\*Corresponding Author: Yongshu Xie**

**Telephone number: (86)-21-64250772**

**E-mail address: [yshxie@ecust.edu.cn](mailto:yshxie@ecust.edu.cn)**

#### Table of contents

|                                                                                                                   |     |
|-------------------------------------------------------------------------------------------------------------------|-----|
| Synthetic details                                                                                                 | S2  |
| Fig. S1 The <sup>1</sup> H NMR spectrum of <b>2a</b> in CDCl <sub>3</sub>                                         | S5  |
| Fig. S2 MALDI-TOF MS of <b>2a</b>                                                                                 | S5  |
| Fig. S3 The <sup>1</sup> H NMR spectrum of <b>3a</b> in CDCl <sub>3</sub>                                         | S6  |
| Fig. S4 MALDI-TOF MS of <b>3a</b>                                                                                 | S6  |
| Fig. S5 The <sup>1</sup> H NMR spectrum of <b>YQ1</b> in CDCl <sub>3</sub> : DMSO- <i>d</i> <sub>6</sub> = 1 : 2  | S7  |
| Fig. S6 MALDI-TOF MS of <b>YQ1</b>                                                                                | S7  |
| Fig. S7 The <sup>1</sup> H NMR spectrum of <b>2b</b> in CDCl <sub>3</sub>                                         | S8  |
| Fig. S8 MALDI-TOF MS of <b>2b</b>                                                                                 | S8  |
| Fig. S9 The <sup>1</sup> H NMR spectrum of <b>3b</b> in CDCl <sub>3</sub>                                         | S9  |
| Fig. S10 MALDI-TOF MS of <b>3b</b>                                                                                | S9  |
| Fig. S11 The <sup>1</sup> H NMR spectrum of <b>YQ2</b> in CDCl <sub>3</sub> : DMSO- <i>d</i> <sub>6</sub> = 1 : 2 | S10 |
| Fig. S12 MALDI-TOF MS of <b>YQ2</b>                                                                               | S10 |
| Fig. S15 The <sup>1</sup> H NMR spectrum of <b>2c</b> in CDCl <sub>3</sub>                                        | S11 |
| Fig. S14 MALDI-TOF MS of <b>2c</b>                                                                                | S11 |
| Fig. S15 The <sup>1</sup> H NMR spectrum of <b>3c</b> in CDCl <sub>3</sub>                                        | S12 |
| Fig. S16 MALDI-TOF MS of <b>3c</b>                                                                                | S12 |
| Fig. S17 The <sup>1</sup> H NMR spectrum of <b>YQ3</b> in CDCl <sub>3</sub> : DMSO- <i>d</i> <sub>6</sub> = 1 : 2 | S13 |
| Fig. S18 MALDI-TOF MS of <b>YQ3</b>                                                                               | S13 |
| Fig. S19 The <sup>1</sup> H NMR spectrum of <b>2d</b> in CDCl <sub>3</sub>                                        | S14 |
| Fig. S20 MALDI-TOF MS of <b>2d</b>                                                                                | S14 |
| Fig. S21 The <sup>1</sup> H NMR spectrum of <b>3d</b> in CDCl <sub>3</sub>                                        | S15 |
| Fig. S22 MALDI-TOF MS of <b>3d</b>                                                                                | S15 |
| Fig. S23 The <sup>1</sup> H NMR spectrum of <b>YQ4</b> in CDCl <sub>3</sub> : DMSO- <i>d</i> <sub>6</sub> = 1 : 2 | S16 |
| Fig. S24 MALDI-TOF MS of <b>YQ4</b>                                                                               | S16 |

## Synthetic details

**5-Bromo-3-hexylthiophene-2-carbaldehyde:** 2,5-Dibromo-3-dihexylthiophene (2.4 g, 7.36 mmol) was mixed with dry THF (75 mL), and n-butyllithium (3.1 mL, 2.4 M in hexane, 7.36 mmol) was added at -78 °C under nitrogen. After the addition was finished, the mixture was stirred for another 1 h and anhydrous DMF (0.6 g, 7.96 mmol) was added. The mixture was slowly warmed to room temperature overnight and poured into 2 N HCl. The organic layer was extracted with CH<sub>2</sub>Cl<sub>2</sub> and dried over Na<sub>2</sub>SO<sub>4</sub>. After the solvent was removed under reduced pressure, the residue was purified on a silica gel column to give the product (1.2 g, yield 60%). <sup>1</sup>H NMR (CDCl<sub>3</sub>, 400 MHz, ppm): δ 0.90 (t, *J* = 6.8 Hz, 3H), 1.29-1.37 (m, 6H), 1.56-1.65 (m, 2H), 2.60 (t, *J* = 7.6 Hz, 2H), 7.46 (s, 1H, thienyl), 9.76 (s, 1H, CHO). <sup>13</sup>C NMR (CDCl<sub>3</sub>, 100 MHz): δ 14.07, 22.56, 28.80, 29.48, 31.55, 122.13, 136.80, 142.88, 143.99, 181.90.

**3-Hexyl-5-trimethylsilylthiophene-2-carbaldehyde:** In a three-necked 250 mL-flask, 5-bromo-3-hexylthiophene-2-carbaldehyde (1.1 g, 4.1 mmol), Pd(PPh<sub>3</sub>)<sub>2</sub>Cl<sub>2</sub> (70 mg, 0.1 mmol) and CuI (38 mg, 0.2 mmol) were mixed in THF (40 mL) and Et<sub>3</sub>N (40 mL) under nitrogen. Then trimethylsilylacetylene (442 mg, 4.5 mmol) was added. After stirring at 50 °C for 24 h, the solvent was removed under reduced pressure, and the residue was purified on a silica gel column to give the target compound (1.1 g, yield 87%). <sup>1</sup>H NMR (CDCl<sub>3</sub>, 400 MHz, ppm): δ 0.27 (s, 9H), 0.89 (t, *J* = 6.8 Hz, 3H), 1.28-1.36 (m, 6H), 1.59-1.67 (m, 2H), 2.69 (t, *J* = 7.6 Hz, 2H), 7.51 (s, 1H, thienyl), 9.81 (s, 1H, CHO). <sup>13</sup>C NMR (CDCl<sub>3</sub>, 100 MHz): δ 14.36, 22.85, 29.09, 29.65, 30.14, 31.80, 96.61, 106.81, 128.35, 136.80, 142.33, 149.69, 182.85.

**3-Hexyl-5-ethynylthiophene-2-carbaldehyde:** 3-hexyl-5-trimethylsilylthiophene-2-carbaldehyde (1.1 g, 3.5 mmol), KOH (0.24 g, 4.2 mmol), a few drops of methanol and 40 mL THF were mixed in a 100 mL flask and stirred for 3 h at room temperature. Then the organic layer was extracted with CH<sub>2</sub>Cl<sub>2</sub> and dried over Na<sub>2</sub>SO<sub>4</sub>. After the solvent was removed under reduced pressure, the residue was purified on a silica gel column to give the target compound (600 mg, yield 78%). <sup>1</sup>H NMR (CDCl<sub>3</sub>, 400 MHz, ppm): δ 0.89 (t, *J* = 6.8 Hz, 3H), 1.27-1.34 (m, 6H), 1.59-1.68 (m, 2H), 2.72 (t, *J* = 7.6 Hz, 2H), 3.67 (s, 1H), 7.53 (s, 1H, thienyl), 9.83 (s, 1H, CHO). <sup>13</sup>C NMR (CDCl<sub>3</sub>, 100 MHz): δ 14.06, 22.55, 28.81, 29.32, 29.93, 31.52, 75.82, 87.68, 126.69, 136.40, 142.56, 149.83, 182.57.

**2a:** Dibromoporphyrin **1** (300 mg, 0.21 mmol), methyl 4-ethynylbenzoate (34 mg, 0.21 mmol), Pd(PPh<sub>3</sub>)<sub>4</sub> (37 mg, 0.03 mmol), CuI (6 mg, 0.03 mmol) were placed in a Schlenk flask, flushed with nitrogen and then charged with dry THF (70 mL) and Et<sub>3</sub>N (10 mL). The mixture was stirred at 50 °C for 18 h. The solvent was removed under reduced pressure, and the residue was dissolved in CH<sub>2</sub>Cl<sub>2</sub>, washed with water, dried over anhydrous sodium sulfate, and the solvent was removed under reduced pressure. The residue was purified on a silica gel column. Recrystallization from CH<sub>2</sub>Cl<sub>2</sub>/CH<sub>3</sub>OH gave the target compound (52 mg, yield 16%). <sup>1</sup>H NMR (CDCl<sub>3</sub>, 400 MHz, ppm): δ 0.34-0.55 (m, 16H), 0.58-0.66 (m, 8H), 0.75-0.83 (m, 20H), 0.86-1.13 (m, 40H), 1.15-1.21 (m, 8H), 3.85 (t, *J* = 6.4 Hz, 8H), 3.99 (s, 3H, OMe), 7.01 (d, *J* = 8.8 Hz, 4H, phenyl), 7.70 (t, *J* = 8.4 Hz, 2H, phenyl), 8.01 (d, *J* = 7.6 Hz, 2H, phenyl), 8.19 (d, *J* = 8.0 Hz, 2H, phenyl), 8.84 (d, *J* = 4.8 Hz, 2H, pyrrolic), 8.91 (d, *J* = 4.4 Hz, 2H, pyrrolic), 9.60 (d, *J* = 4.4 Hz, 2H, pyrrolic), 9.66 (d, *J* = 4.4 Hz, 2H, pyrrolic). MS (MALDI-TOF, *m/z*): [M] calcd for C<sub>90</sub>H<sub>121</sub>BrN<sub>4</sub>O<sub>6</sub>Zn, 1496.78; found, 1496.71. IR (KBr pellet, cm<sup>-1</sup>): 2922(s), 2852(m), 2183(w), 2030(w), 1958(m), 1727(m), 1660(m), 1589(w), 1455(m), 1434(w), 1272(m), 1248(w), 1100(s), 995(m), 792(m).

**2b:** It was prepared according to the procedure same as that for **2a**, except that

4-ethynylbenzaldehyde (30 mg, 0.23 mmol) was used instead of methyl 4-ethynylbenzoate. Yield: 53 mg, 17%. <sup>1</sup>H NMR (CDCl<sub>3</sub>, 400 MHz, ppm): δ 0.35-0.54 (m, 16H), 0.57-0.65 (m, 8H), 0.74-0.83 (m, 20H), 0.86-1.11 (m, 40H), 1.13-1.21 (m, 8H), 3.85 (t, *J* = 6.4 Hz, 8H), 7.01 (d, *J* = 8.4 Hz, 4H, phenyl), 7.71 (t, *J* = 8.4 Hz, 2H, phenyl), 7.98 (d, *J* = 7.6 Hz, 2H, phenyl), 8.04 (d, *J* = 8.0 Hz, 2H, phenyl), 8.85 (d, *J* = 4.4 Hz, 2H, pyrrolic), 8.91 (d, *J* = 4.8 Hz, 2H, pyrrolic), 9.60 (d, *J* = 4.8 Hz, 2H, pyrrolic), 9.64 (d, *J* = 4.8 Hz, 2H, pyrrolic), 10.06 (s, 1H, CHO). MS (MALDI-TOF, *m/z*): [M] calcd for C<sub>89</sub>H<sub>119</sub>BrN<sub>4</sub>O<sub>5</sub>Zn, 1466.77; found, 1466.57. IR (KBr pellet, cm<sup>-1</sup>): 2922(s), 2852(m), 2191(w), 2027(w), 1956(m), 1703(m), 1660(s), 1592(s), 1456(s), 1382(w), 1296(w), 1246(m), 1200(m), 1101(s), 995(s), 822(w), 789(m), 711(w).

**2c:** It was prepared according to the procedure same as that for **2a**, except that 5-ethynylthiophene-2-carbaldehyde (32 mg, 0.23 mmol) was used instead of methyl 4-ethynylbenzoate. Yield: 47 mg, 15%. <sup>1</sup>H NMR (CDCl<sub>3</sub>, 400 MHz, ppm): δ 0.33-0.55 (m, 16H), 0.58-0.66 (m, 8H), 0.76-0.84 (m, 20H), 0.87-1.13 (m, 40H), 1.18-1.22 (m, 8H), 3.85 (t, *J* = 6.4 Hz, 8H), 7.01 (d, *J* = 8.4 Hz, 4H, phenyl), 7.60 (d, *J* = 4.0 Hz, 1H, thienyl), 7.70 (t, *J* = 8.4 Hz, 2H, phenyl), 7.78 (d, *J* = 3.6 Hz, 1H, thienyl), 8.83 (d, *J* = 4.4 Hz, 2H, pyrrolic), 8.93 (d, *J* = 4.8 Hz, 2H, pyrrolic), 9.17 (d, *J* = 4.8 Hz, 2H, pyrrolic), 9.60 (d, *J* = 4.8 Hz, 2H, pyrrolic), 9.97 (s, 1H, CHO). MS (MALDI-TOF, *m/z*): [M] calcd for C<sub>87</sub>H<sub>117</sub>BrN<sub>4</sub>O<sub>5</sub>SZn, 1472.22; found, 1472.55. IR (KBr pellet, cm<sup>-1</sup>): 2922(s), 2852(m), 2183(w), 2027(w), 1956(m), 1669(s), 1589(m), 1456(s), 1429(w), 1247(w), 1223(w), 1205(w), 1100(s), 1064(w), 997(s), 930(w), 791(m), 719(m).

**2d:** It was prepared according to the procedure same as that for **2a**, except that 3-hexyl-5-ethynylthiophene-2-carbaldehyde (56 mg, 0.25 mmol) was used instead of methyl 4-ethynylbenzoate. Yield: 50 mg, 15%. <sup>1</sup>H NMR (CDCl<sub>3</sub>, 400 MHz, ppm): δ 0.37-0.53 (m, 16H), 0.58-0.66 (m, 8H), 0.75-0.83 (m, 20H), 0.86-1.13 (m, 43H), 1.16-1.22 (m, 8H), 1.42-1.48 (m, 4H), 1.95-2.03 (m, 4H), 3.22 (t, *J* = 8.0 Hz, 2H), 3.85 (t, *J* = 6.4 Hz, 8H), 7.00 (d, *J* = 8.4 Hz, 4H, phenyl), 7.70 (t, *J* = 8.4 Hz, 2H, phenyl), 7.74 (s, 1H, thienyl), 8.83 (d, *J* = 4.4 Hz, 2H, pyrrolic), 8.89 (d, *J* = 4.8 Hz, 2H, pyrrolic), 9.57 (d, *J* = 4.8 Hz, 2H, pyrrolic), 9.59 (d, *J* = 4.4 Hz, 2H, pyrrolic), 9.94 (s, 1H, CHO). MS (MALDI-TOF, *m/z*): [M] calcd for C<sub>93</sub>H<sub>129</sub>BrN<sub>4</sub>O<sub>5</sub>SZn, 1556.82; found, 1556.81. IR (KBr pellet, cm<sup>-1</sup>): 3359(br), 2922(s), 2852(s), 2175(w), 2027(w), 1956(m), 1660(s), 1588(w), 1456(s), 1425(w), 1245(m), 1200(w), 1162(w), 1097(m), 994(s), 790(m), 717(w).

**3a:** Compound **2a** (50 mg, 0.033 mmol), 2-diphenylamino-5-tributylstannylthiophene (20 mg, 0.037 mmol) and Pd(PPh<sub>3</sub>)<sub>4</sub> (2 mg, 0.002 mmol) were dissolved in dry toluene (10 mL) and the reaction mixture was degassed with nitrogen. Then the mixture was heated at 80°C for 5 h. After cooling to room temperature, toluene was removed *in vacuo*, and the residue was purified by column chromatography on silica gel. Recrystallization from CH<sub>2</sub>Cl<sub>2</sub>/CH<sub>3</sub>OH gave the target compound (33 mg, yield 60%). <sup>1</sup>H NMR (CDCl<sub>3</sub>, 400 MHz, ppm): δ 0.34-0.53 (m, 16H), 0.56-0.63 (m, 8H), 0.73-0.81 (m, 20H), 0.84-1.09 (m, 40H), 1.11-1.18 (m, 8H), 3.83 (t, *J* = 6.0 Hz, 8H), 3.99 (s, 3H, OMe), 7.00 (d, *J* = 8.4 Hz, 4H, phenyl), 7.08-7.12 (m, 3H), 7.35-7.45 (m, 8H, phenyl), 7.61 (d, *J* = 3.2 Hz, 1H, thienyl), 7.70 (t, *J* = 8.0 Hz, 2H, phenyl), 8.04 (d, *J* = 8.0 Hz, 2H, phenyl), 8.20 (d, *J* = 8.0 Hz, 2H, phenyl), 8.85 (d, *J* = 4.4 Hz, 2H, pyrrolic), 8.93 (d, *J* = 4.4 Hz, 2H, pyrrolic), 9.18 (d, *J* = 4.4 Hz, 2H, pyrrolic), 9.71 (d, *J* = 4.4 Hz, 2H, pyrrolic). MS (MALDI-TOF, *m/z*): [M] calcd for C<sub>106</sub>H<sub>133</sub>N<sub>5</sub>O<sub>6</sub>SZn, 1667.93; found, 1667.82. IR (KBr pellet, cm<sup>-1</sup>): 2923(s), 2852(m), 2191(w), 2027(w), 1956(m), 1723(m), 1664(m), 1590(m), 1494(w), 1455(m), 1272(m), 1242(w), 1175(w), 1100(s), 994(m), 960(w), 790(m).

**3b:** It was prepared according to the procedure same as that for **3a**, except that **2b** (50 mg, 0.034 mmol) was used instead of **2a**. Yield: 34 mg, 62%. <sup>1</sup>H NMR (CDCl<sub>3</sub>, 400 MHz, ppm): δ 0.34-0.54 (m, 16H), 0.55-0.64 (m, 8H), 0.72-0.81 (m, 20H), 0.84-1.06 (m, 40H), 1.12-1.22 (m, 8H), 3.84 (t, *J* = 6.4 Hz, 8H), 7.00 (d, *J* = 8.4 Hz, 4H, phenyl), 7.07-7.12 (m, 3H), 7.35-7.45 (m, 8H, phenyl), 7.61 (d, *J* = 3.6 Hz, 1H, thienyl), 7.71 (t, *J* = 8.4 Hz, 2H, phenyl), 7.92 (d, *J* = 8.0 Hz, 2H, phenyl), 8.02 (d, *J* = 8.0 Hz, 2H, phenyl), 8.84 (d, *J* = 4.4 Hz, 2H, pyrrolic), 8.94 (d, *J* = 4.8 Hz, 2H, pyrrolic), 9.18 (d, *J* = 4.4 Hz, 2H, pyrrolic), 9.69 (d, *J* = 4.8 Hz, 2H, pyrrolic), 9.99 (s, 1H, CHO). MS (MALDI-TOF, *m/z*): [M] calcd for C<sub>105</sub>H<sub>131</sub>N<sub>5</sub>O<sub>5</sub>SZn, 1637.92; found, 1637.99. IR (KBr pellet, cm<sup>-1</sup>): 3357(br), 2922(s), 2851(s), 2183(w), 2030(w), 1956(m), 1697(w), 1659(m), 1632(m), 1596(s), 1494(w), 1455(s), 1250(w), 1204(w), 1199(m), 995(m), 790(m).

**3c:** It was prepared according to the procedure same as that for **3a**, except that **2c** (47 mg, 0.033 mmol) was used instead of **2a**. Yield: 32 mg, 59%. <sup>1</sup>H NMR (CDCl<sub>3</sub>, 400 MHz, ppm): δ 0.35-0.53 (m, 16H), 0.56-0.63 (m, 8H), 0.72-0.81 (m, 20H), 0.83-1.06 (m, 40H), 1.12-1.19 (m, 8H), 3.84 (t, *J* = 6.4 Hz, 8H), 7.01 (d, *J* = 8.4 Hz, 4H, phenyl), 7.08-7.12 (m, 3H), 7.35-7.45 (m, 8H, phenyl), 7.60 (d, *J* = 3.6 Hz, 1H, thienyl), 7.68-7.73 (m, 3H, phenyl), 7.85 (d, *J* = 4.0 Hz, 1H, thienyl), 8.89 (d, *J* = 4.4 Hz, 2H, pyrrolic), 8.93 (d, *J* = 4.4 Hz, 2H, pyrrolic), 9.53 (d, *J* = 4.4 Hz, 2H, pyrrolic), 9.59 (d, *J* = 4.4 Hz, 2H, pyrrolic), 9.90 (s, 1H, CHO). MS (MALDI-TOF, *m/z*): [M] calcd for C<sub>103</sub>H<sub>129</sub>N<sub>5</sub>O<sub>5</sub>S<sub>2</sub>Zn, 1643.87; found, 1644.19. IR (KBr pellet, cm<sup>-1</sup>): 2922(s), 2851(m), 2179(m), 2027(w), 1959(m), 1668(s), 1588(m), 1455(s), 1245(w), 1200(w), 1099(s), 995(m), 793(m), 752(w), 707(w), 697(m).

**3d:** It was prepared according to the procedure same as that for **3a**, except that **2d** (50 mg, 0.032 mmol) was used instead of **2a**. Yield: 36 mg, 65%. <sup>1</sup>H NMR (CDCl<sub>3</sub>, 400 MHz, ppm): δ 0.34-0.54 (m, 16H), 0.55-0.63 (m, 8H), 0.70-0.82 (m, 20H), 0.83-1.07 (m, 43H), 1.12-1.19 (m, 8H), 1.57-1.67 (m, 4H), 1.96-2.07 (m, 4H), 3.24 (t, *J* = 8.0 Hz, 2H), 3.83 (t, *J* = 6.4 Hz, 8H), 7.00 (d, *J* = 8.4 Hz, 4H, phenyl), 7.08-7.12 (m, 3H), 7.35-7.45 (m, 8H), 7.60 (d, *J* = 3.6 Hz, 1H, thienyl), 7.70 (t, *J* = 8.4 Hz, 3H, phenyl), 7.75 (s, 1H, thienyl), 8.84 (d, *J* = 4.4 Hz, 2H, pyrrolic), 8.93 (d, *J* = 4.8 Hz, 2H, pyrrolic), 9.17 (d, *J* = 4.8 Hz, 2H, pyrrolic), 9.62 (d, *J* = 4.8 Hz, 2H, pyrrolic), 9.93 (s, 1H, CHO). MS (MALDI-TOF, *m/z*): [M] calcd for C<sub>109</sub>H<sub>141</sub>N<sub>5</sub>O<sub>5</sub>S<sub>2</sub>Zn, 1727.97; found, 1728.02. IR (KBr pellet, cm<sup>-1</sup>): 2922(s), 2852(s), 2174(m), 2030(w), 1956(m), 1667(s), 1591(m), 1495(m), 1455(s), 1248(m), 1178(w), 1099(m), 994(m), 790(m).

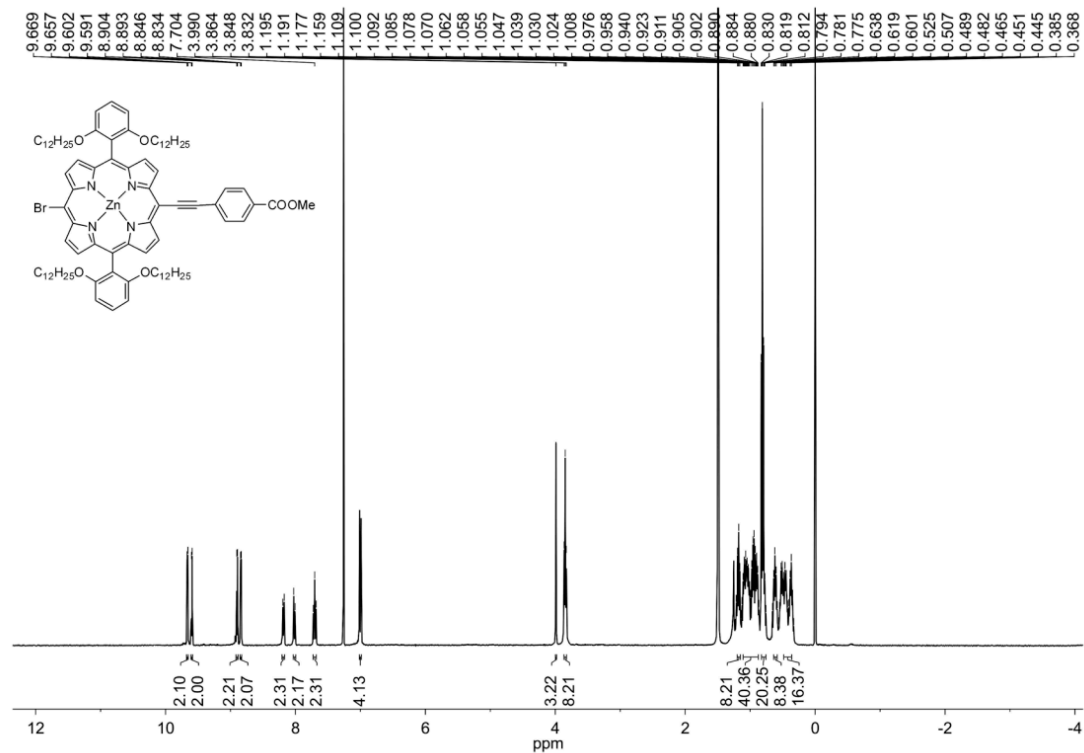

**Fig. S1** The  $^1\text{H}$  NMR spectrum of **2a** in  $\text{CDCl}_3$

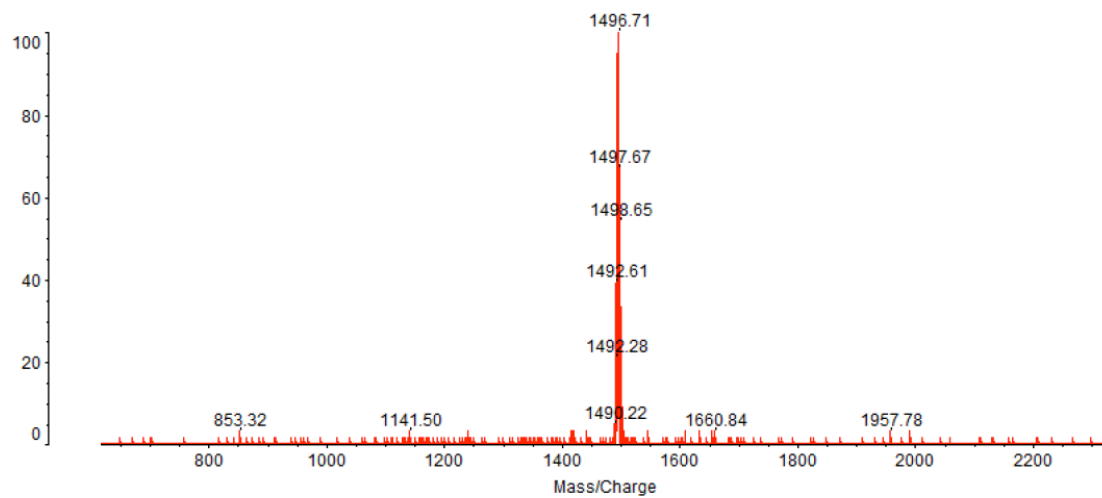

**Fig. S2** MALDI-TOF MS of **2a**

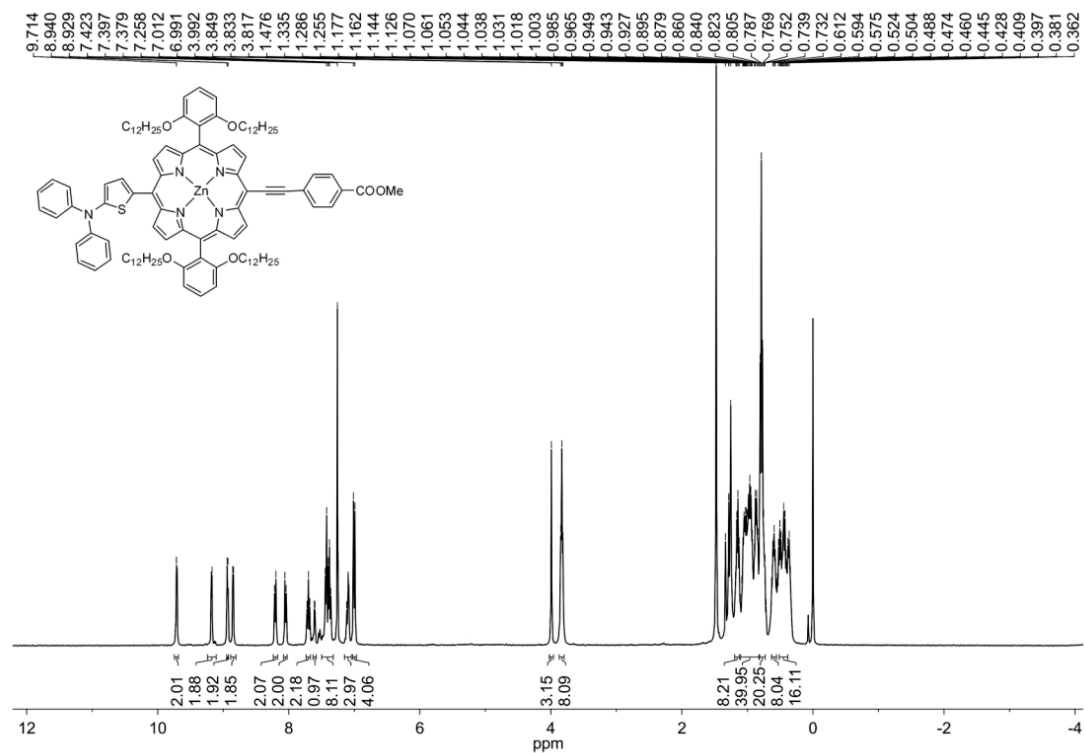

**Fig. S3** The  $^1H$  NMR spectrum of **3a** in  $CDCl_3$

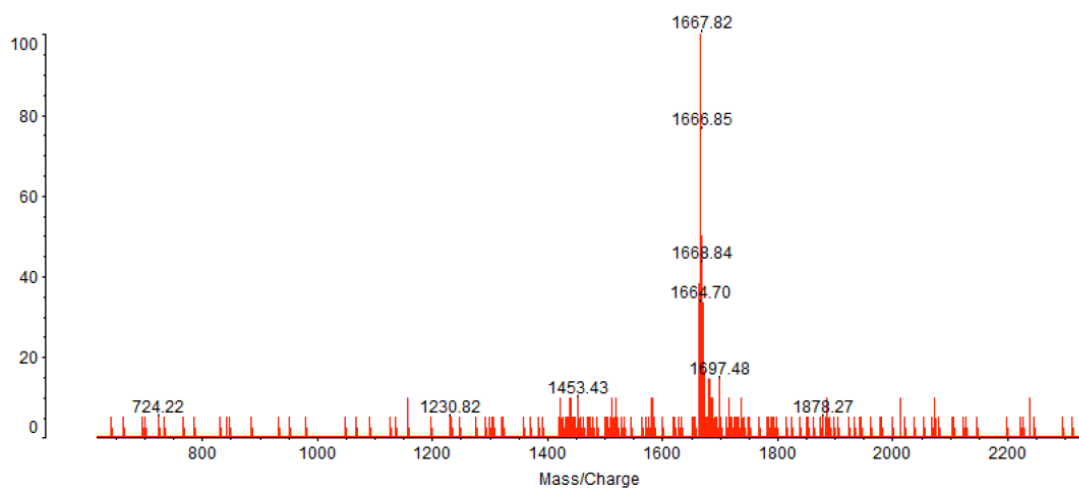

**Fig. S4** MALDI-TOF MS of **3a**

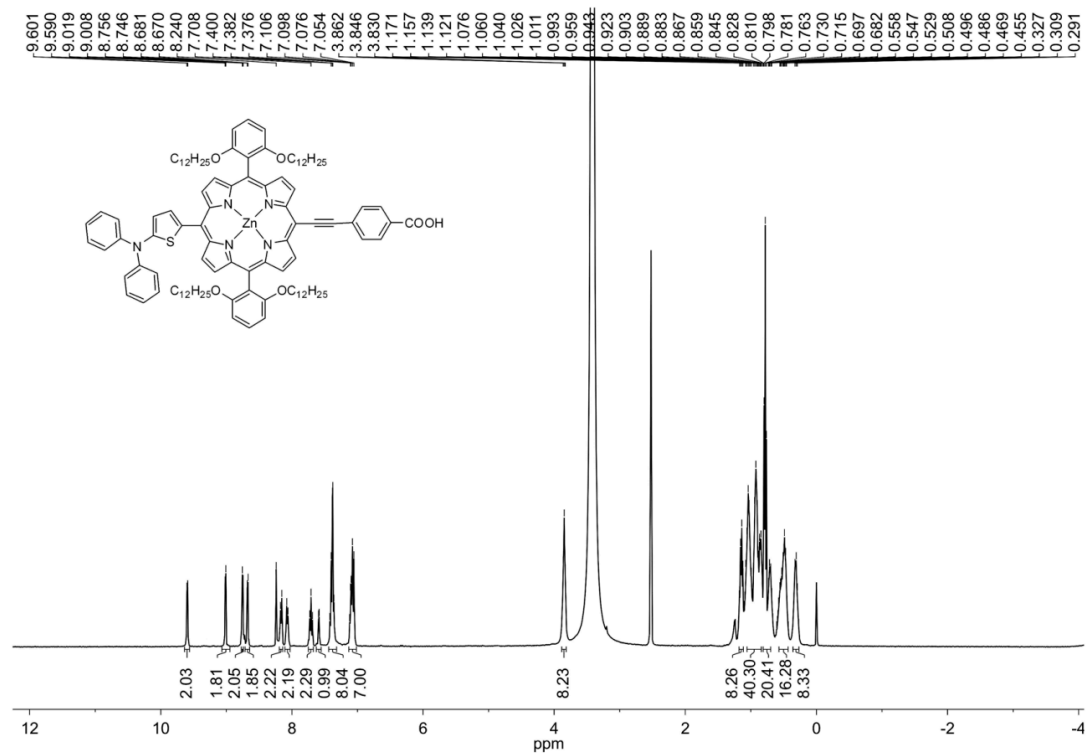

**Fig. S5** The <sup>1</sup>H NMR spectrum of **YQ1** in CDCl<sub>3</sub> : DMSO-*d*<sub>6</sub> = 1 : 2

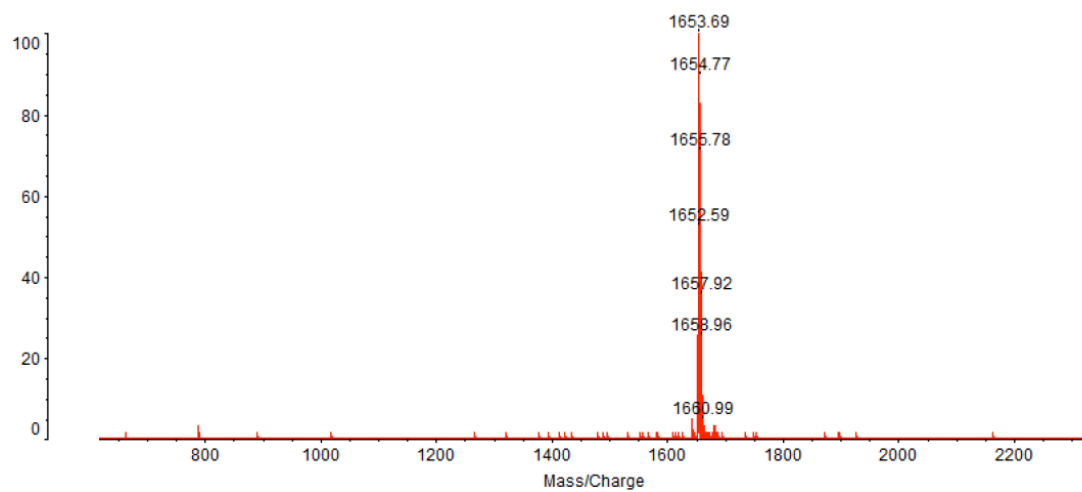

**Fig. S6** MALDI-TOF MS of **YQ1**

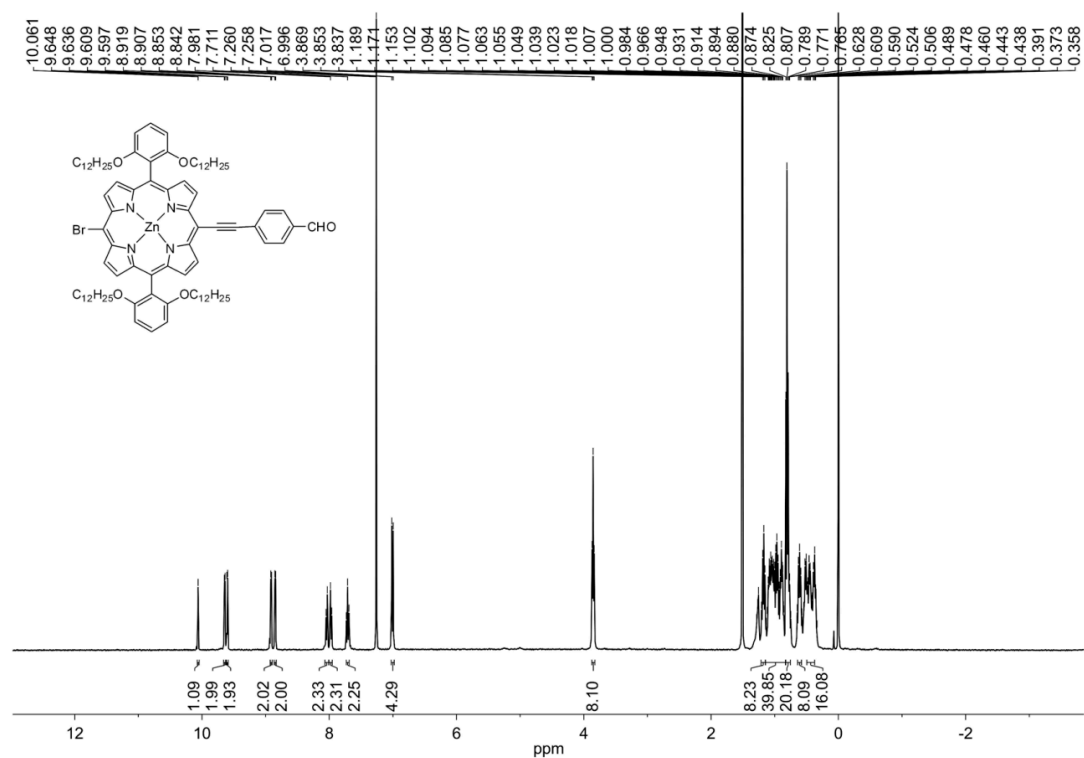

**Fig. S7** The <sup>1</sup>H NMR spectrum of **2b** in CDCl<sub>3</sub>

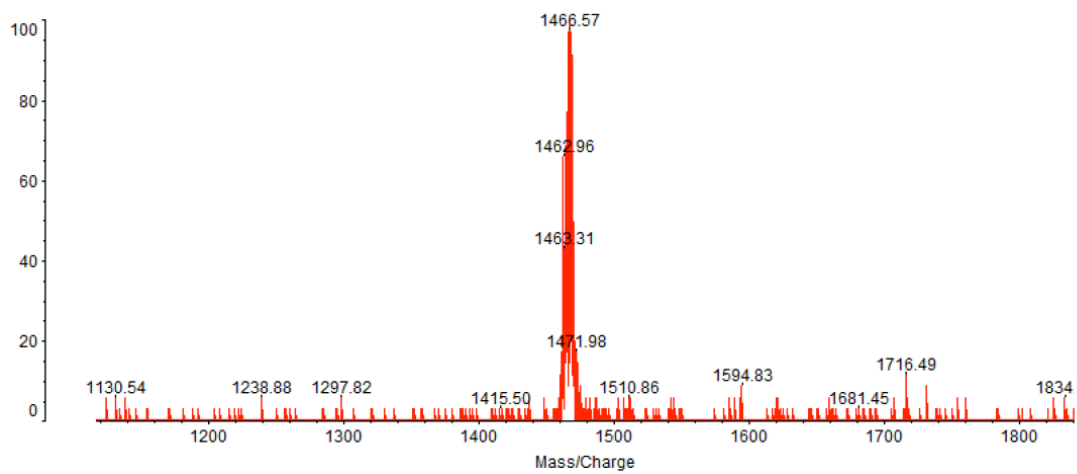

**Fig. S8** MALDI-TOF MS of **2b**



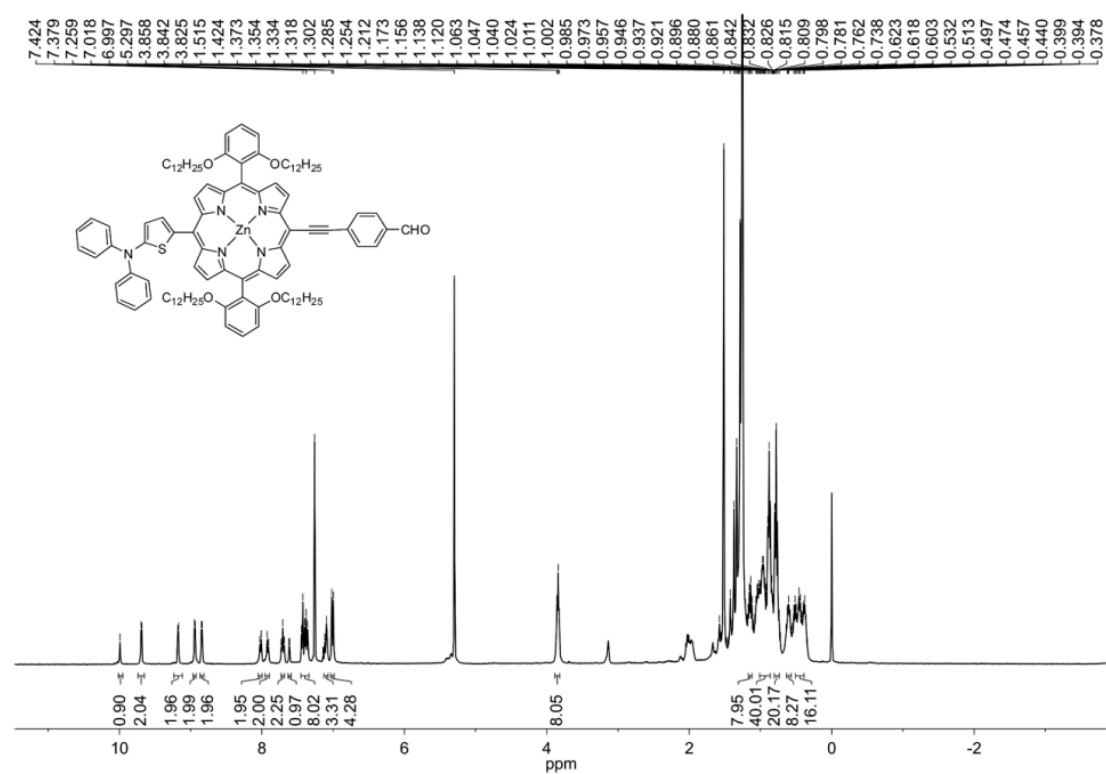

**Fig. S9** The <sup>1</sup>H NMR spectrum of **3b** in CDCl<sub>3</sub>

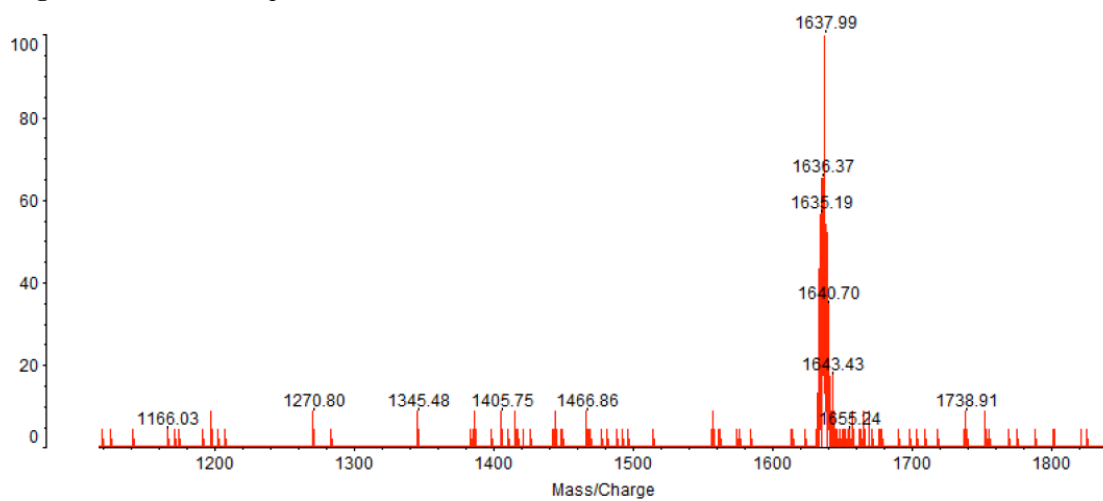

**Fig. S10** MALDI-TOF MS of **3b**

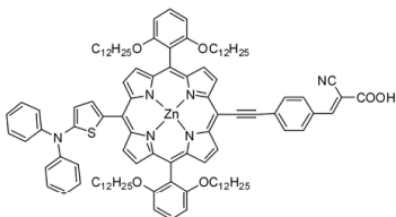

**Fig. S11** The  $^1\text{H}$  NMR spectrum of **YQ2** in  $\text{CDCl}_3 : \text{DMSO-}d_6 = 1 : 2$

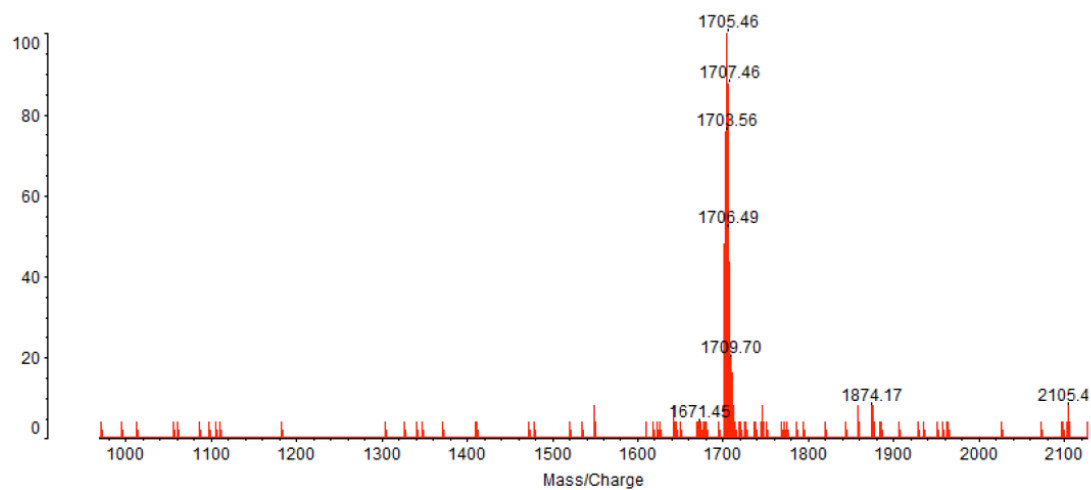

**Fig. S12 MALDI-TOF MS of YQ2**

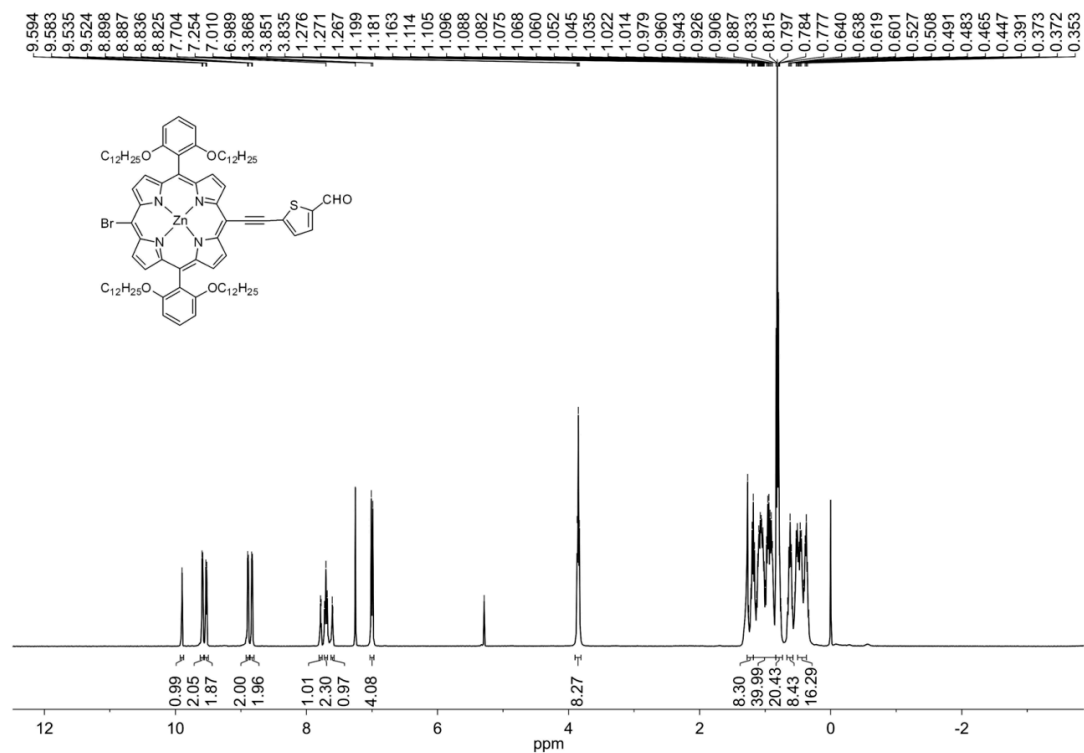

**Fig. S13** The <sup>1</sup>H NMR spectrum of **2c** in CDCl<sub>3</sub>

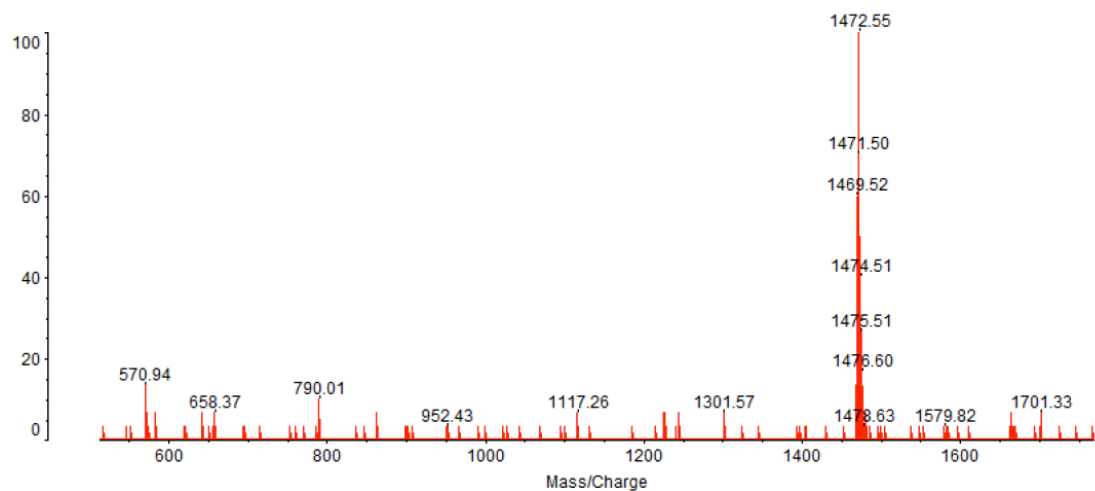

**Fig. S14** MALDI-TOF MS of **2c**

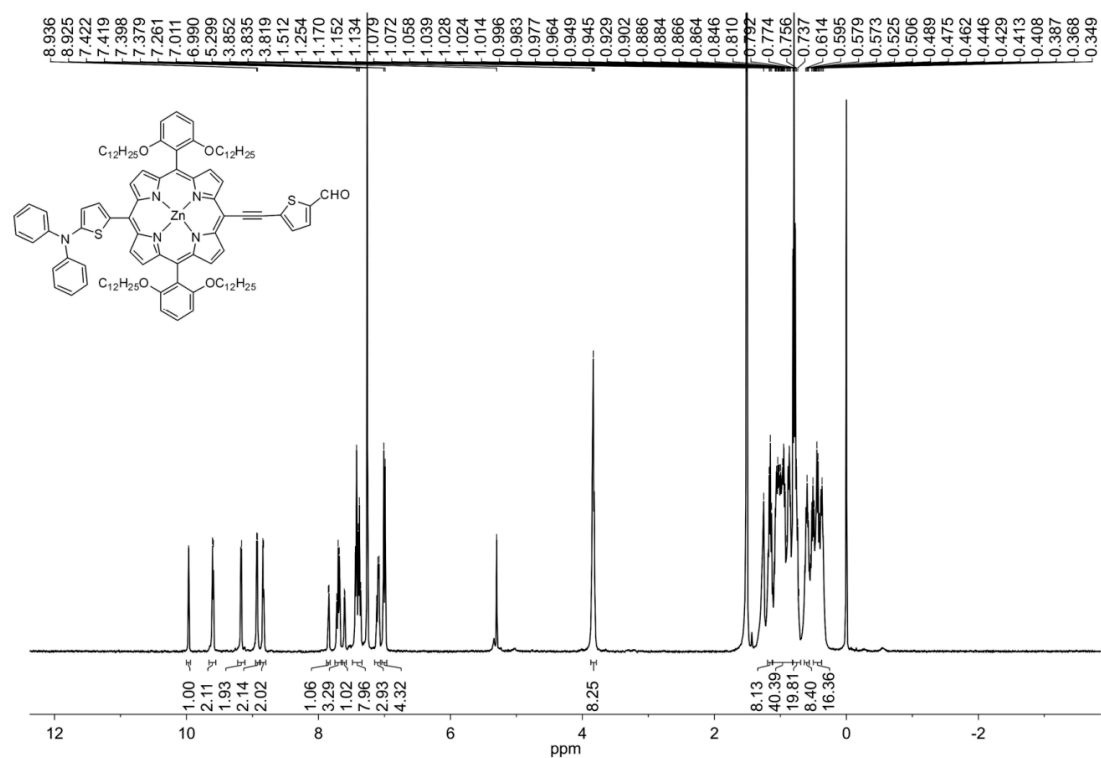

**Fig. S15** The <sup>1</sup>H NMR spectrum of **3c** in CDCl<sub>3</sub>

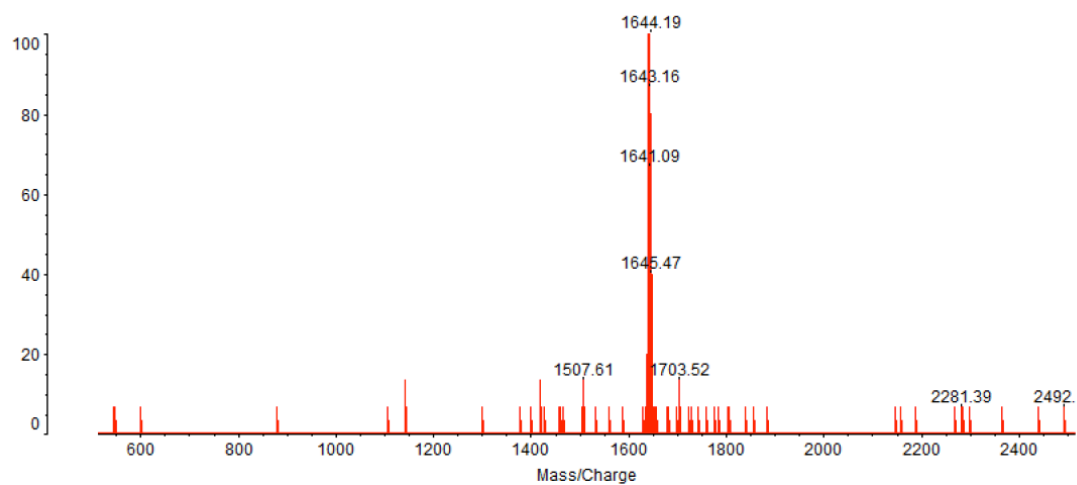

**Fig. S16** MALDI-TOF MS of **3c**

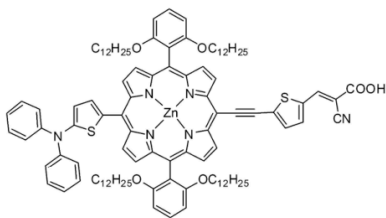

**Fig. S17** The  $^1\text{H}$  NMR spectrum of **YQ3** in  $\text{CDCl}_3 : \text{DMSO-}d_6 = 1 : 2$

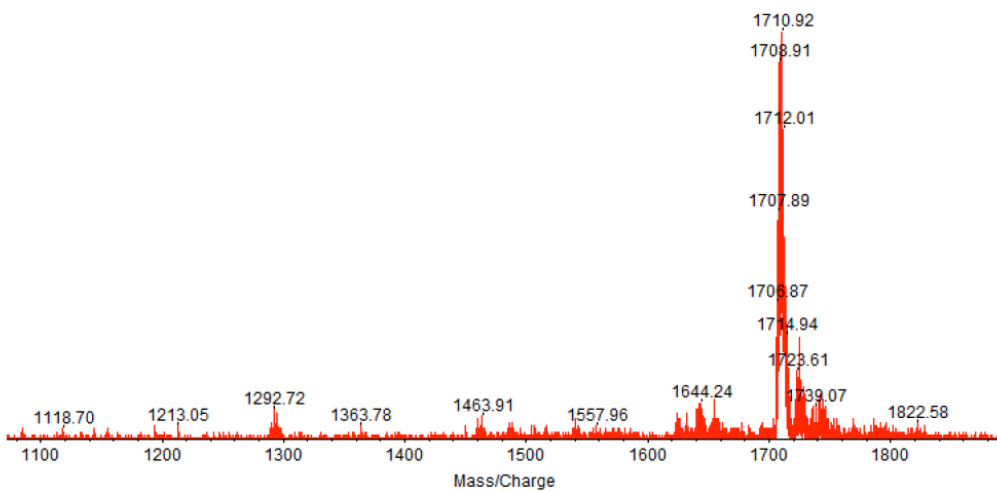

**Fig. S18 MALDI-TOF MS of YQ3**

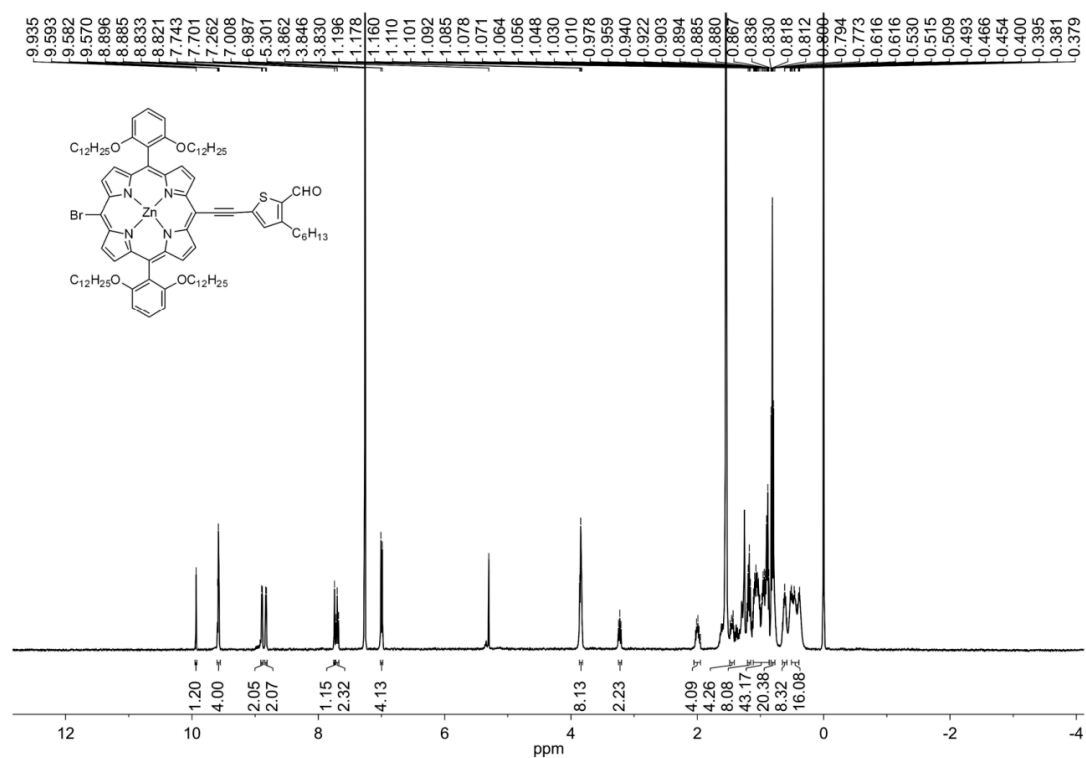

**Fig. S19** The <sup>1</sup>H NMR spectrum of **2d** in CDCl<sub>3</sub>

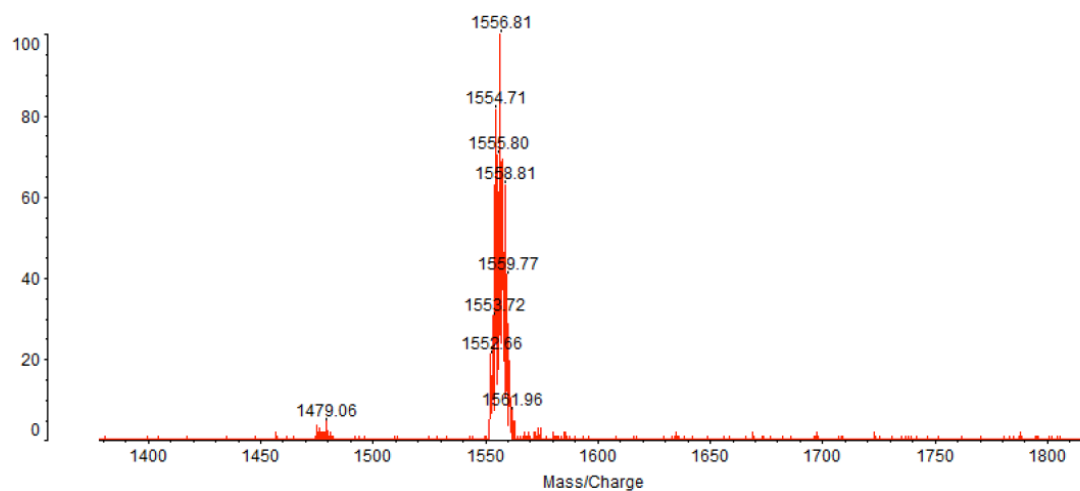

**Fig. S20** MALDI-TOF MS of **2d**

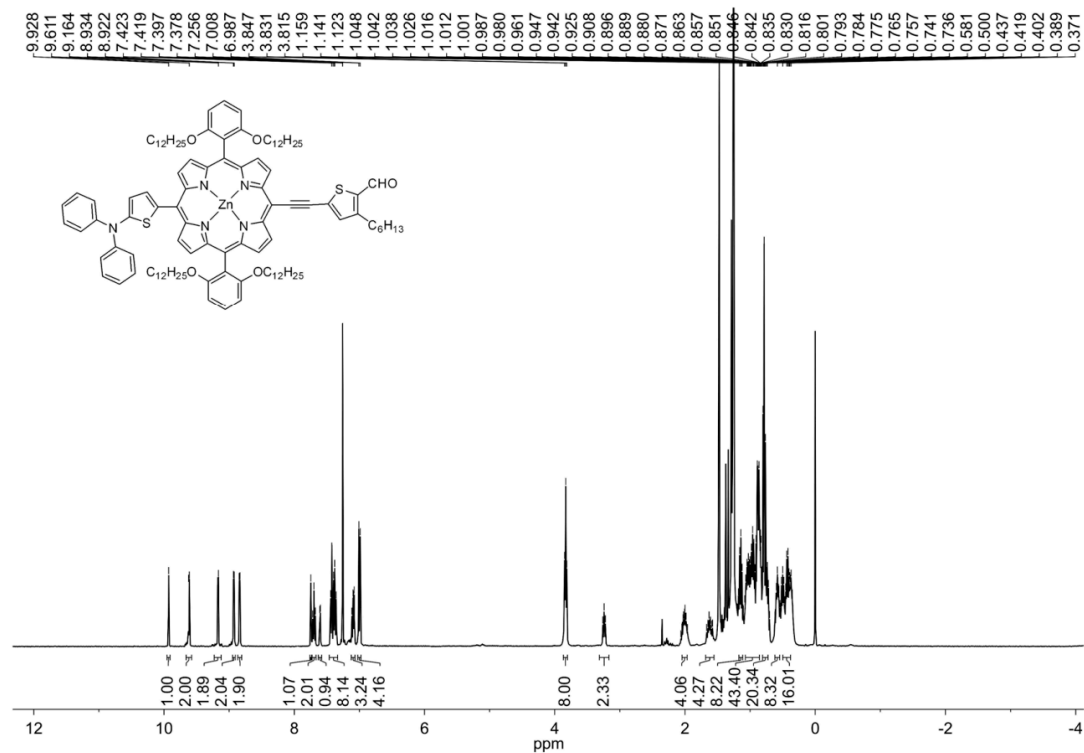

**Fig. S21** The <sup>1</sup>H NMR spectrum of **3d** in CDCl<sub>3</sub>

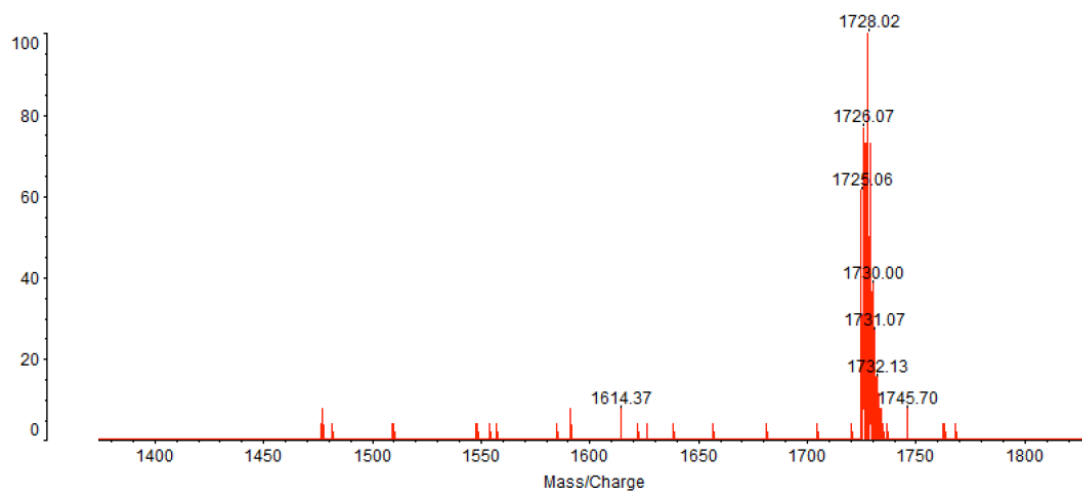

**Fig. S22** MALDI-TOF MS of **3d**

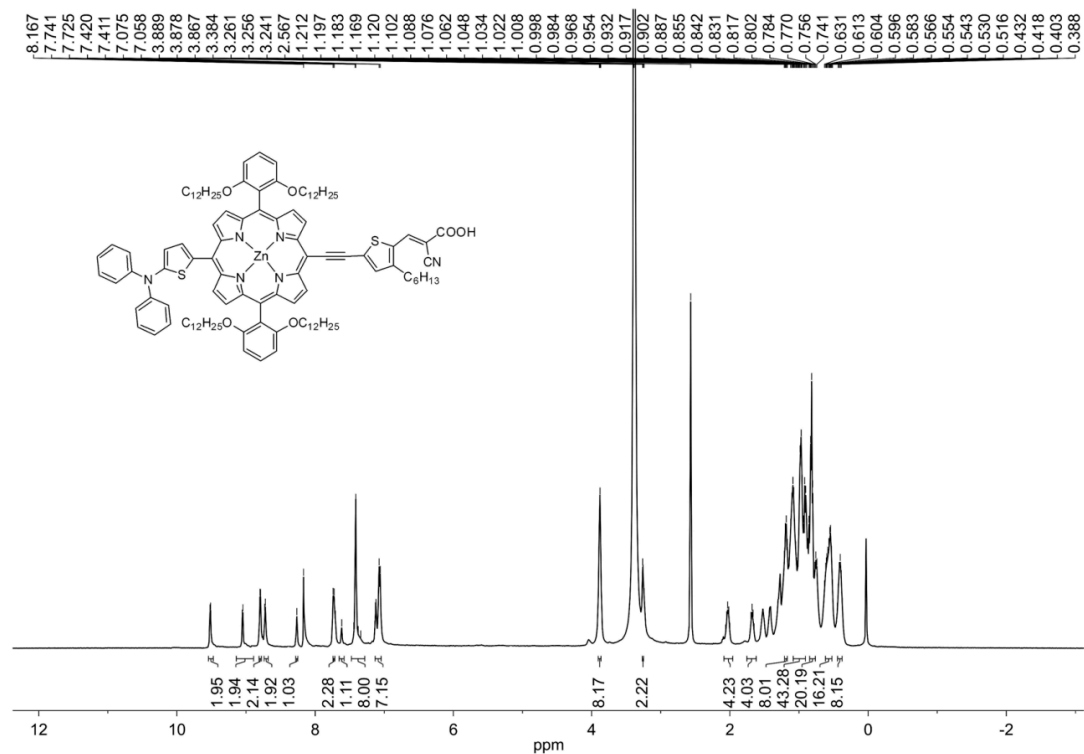

**Fig. S23** The  $^1\text{H}$  NMR spectrum of YQ4 in  $\text{CDCl}_3$  :  $\text{DMSO-}d_6$  = 1 : 2

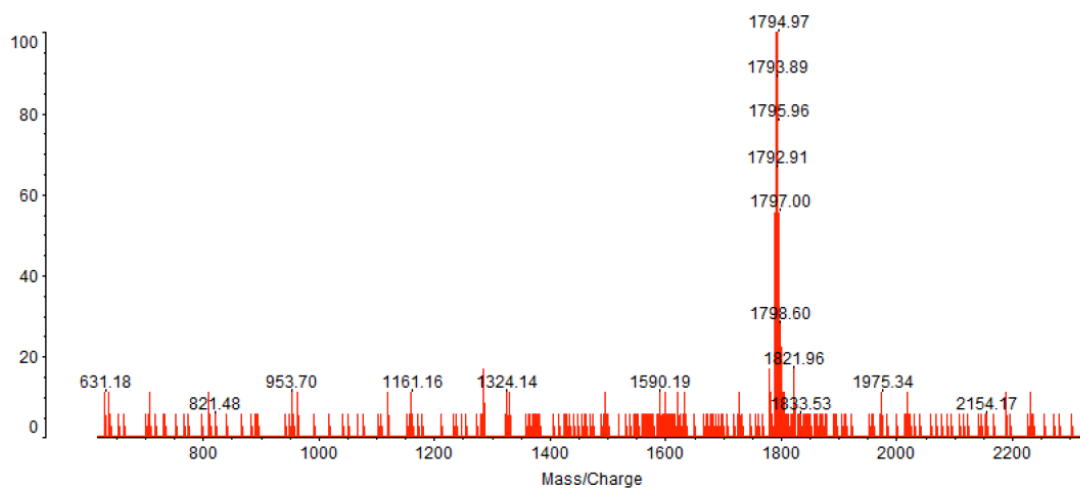

**Fig. S24** MALDI-TOF MS of YQ4
